# Supplementary material
Source: Research Square preprint supplement (doi:10.21203/rs.3.rs-9717052/v1)
Supplement: Supplementary file 1 [file cf579b790a3201fa503caae5.docx]

**Table 1.** Coffee group description. Arabica beans (n=9) were randomly placed into three groups (each n=3); (1st group (Brazil, Indonesia, Haiti), 2nd group (Colombia, Hawaii, India) and 3rd group (Papua New Guinea, Peru, Mexico).

Coffee groups Species Description Country Sample

Arabica Fazenda Bela Vista Brazil S1

Group1 Arabica Bali Organic Kintamani Indonesia S2

Arabica Blue Pine Central Haiti S3

Arabica Aroma Craft Colombia S4

Group2 Arabica Hawaii Kona Peaberry United States S5

Arabica Monsooned Malabar India S6

Arabica Arokara AA Papua New Guinea S7

Group3 Arabica Organic La Florida Peru S8

Arabica Laja Honey Mexico S9

**Table 2.** Colorimetric values of light, medium, and dark roast Arabica bean samples. AL1, 2 and 3 represent light roast *Arabica* bean groups, AM1, 2 and 3 represent medium roast *Arabica* bean groups, and AD1, 2, 3 represent dark roast *Arabica* bean groups (note: the degrees of light, medium and dark roast beans are estimated to be those of Arabic (Agtron 80-70), American medium (Agtron 54-48) and Full city (Agtron 40-36) roast beans, respectively).

Light Roast L-value a-value b-value

AL1 68.1±0.1 8.9±0.1 16.2±0.1

AL2 70.3±0.3 8.0±0.1 18.0±0.4

AL3 68.7±0.5 7.9±0.5 16.4±0.5

**Average** 69.0±1.0 8.3±0.6 16.9±0.9

Medium Roast L-value a-value b-value

AM1 46.9±1.0 10.2±0.2 10.4±0.3

AM2 47.1±0.8 10.2±0.1 10.9±0.9

AM3  48.7±0.7 10.7±0.6 11.6±0.7

**Average**  47.6±1.1 10.3±0.4 11.0±0.8

Dark Roast L-value a-value b-value

AD1 37.2±0.3 7.2±0.3 5.3±0.3

AD2 37.9±0.4 7.3±0.4 5.4±0.5

AD3  39.2±0.2 6.8±0.2 5.1±0.2

**Average**  38.1±0.9 7.1±0.4 5.2±0.3

**Table 3.** HPLC data on major coffee compounds. Caffeine, 3-CQA, 4-CQA, 5-CQA, javamide-II, trigonelline and caffeine were quantified by HPLC as described in “Materials and Methods”. FC, LR and DR represent fold change, light roast and dark roast, respectively.

Compounds LR (mg/5g) DR (mg/5g) FC≤-1 P<0.05

Caffeine 64.7±5.3 69.2±5.9 No No

3-CQA 31±2.1 6.4±0.5 Yes Yes

4-CQA 33±2.1 9±0.6 Yes Yes

5-CQA 149±10.1 12.7±1.1 Yes Yes

5-FQA 6.5±0.5 3±0.2 Yes Yes

Javamide-II 1.2±0.1 0.19±0.03 Yes Yes

Trigonelline 37±3.1 20±1.7 No Yes
